# Supplementary material for: Enhancing the electrochromic response of polyaniline films by the preparation of hybrid materials based on polyaniline, chitosan and organically modified clay
Source: Royal Society of Chemistry journal article supplement (doi:10.1039/c3ra47474g), 2014-01-01
Supplement: c3ra47474g1.pdf [file c3ra47474g1.pdf]

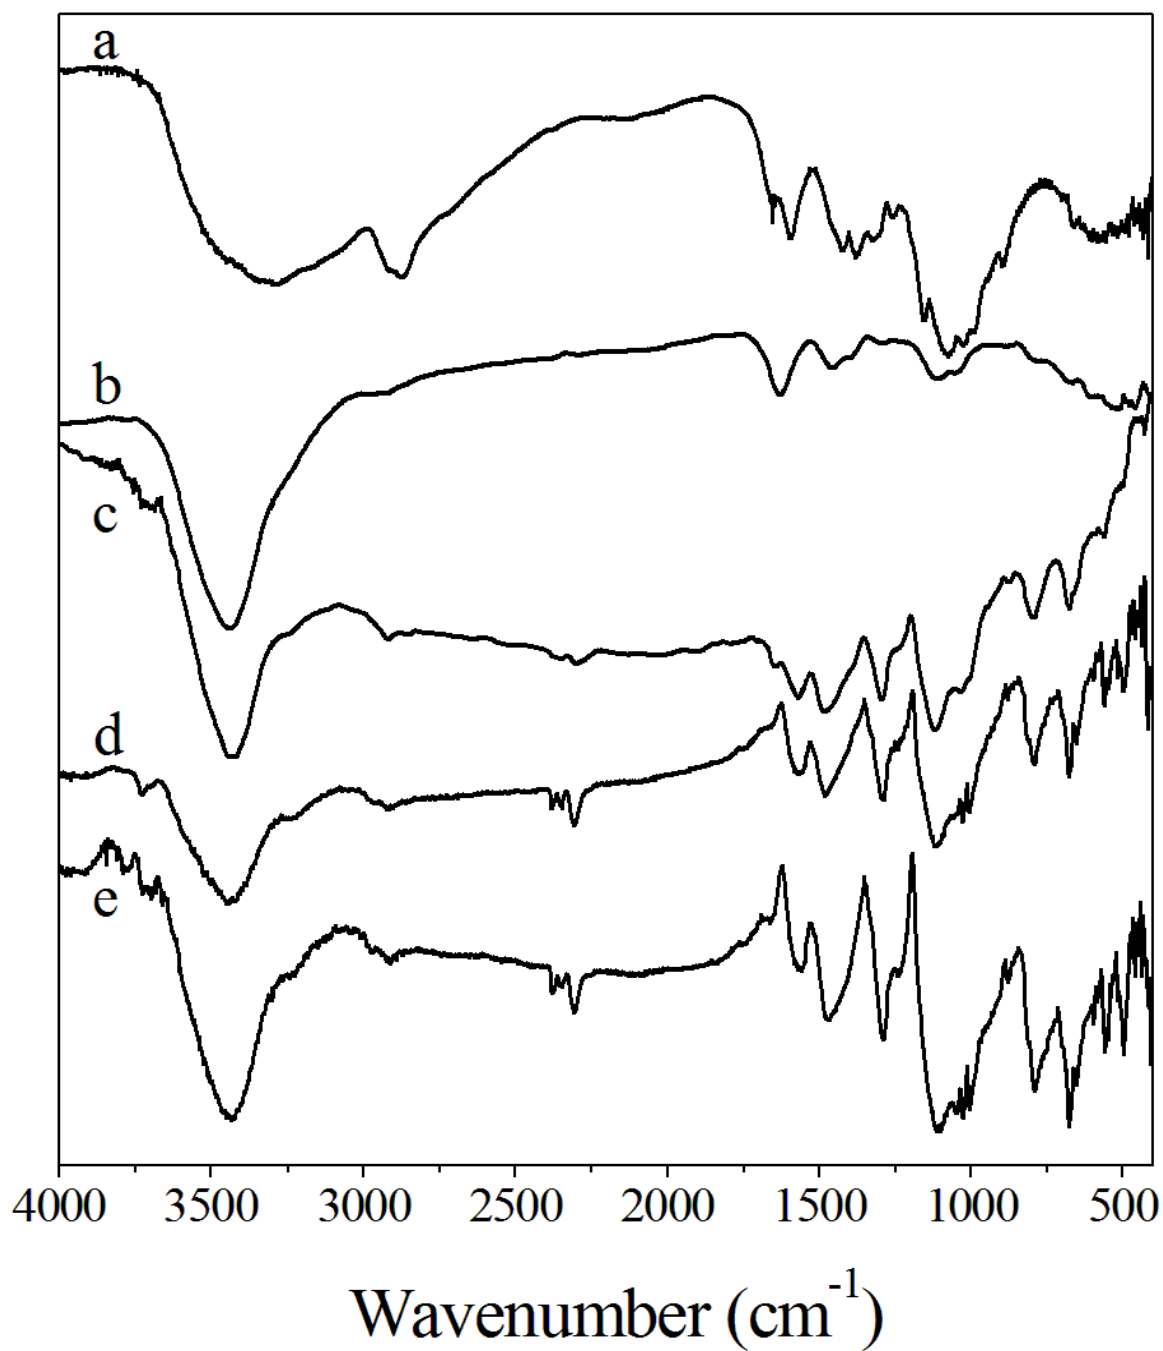

FTIR curves for (a) chitosan, (b) PANi-chitosan 40/60 wt/wt, (c) PANi-chitosan 50/50 wt/wt, (d) PANi-chitosan 66.7/33.3 wt/wt and (e) PANi.

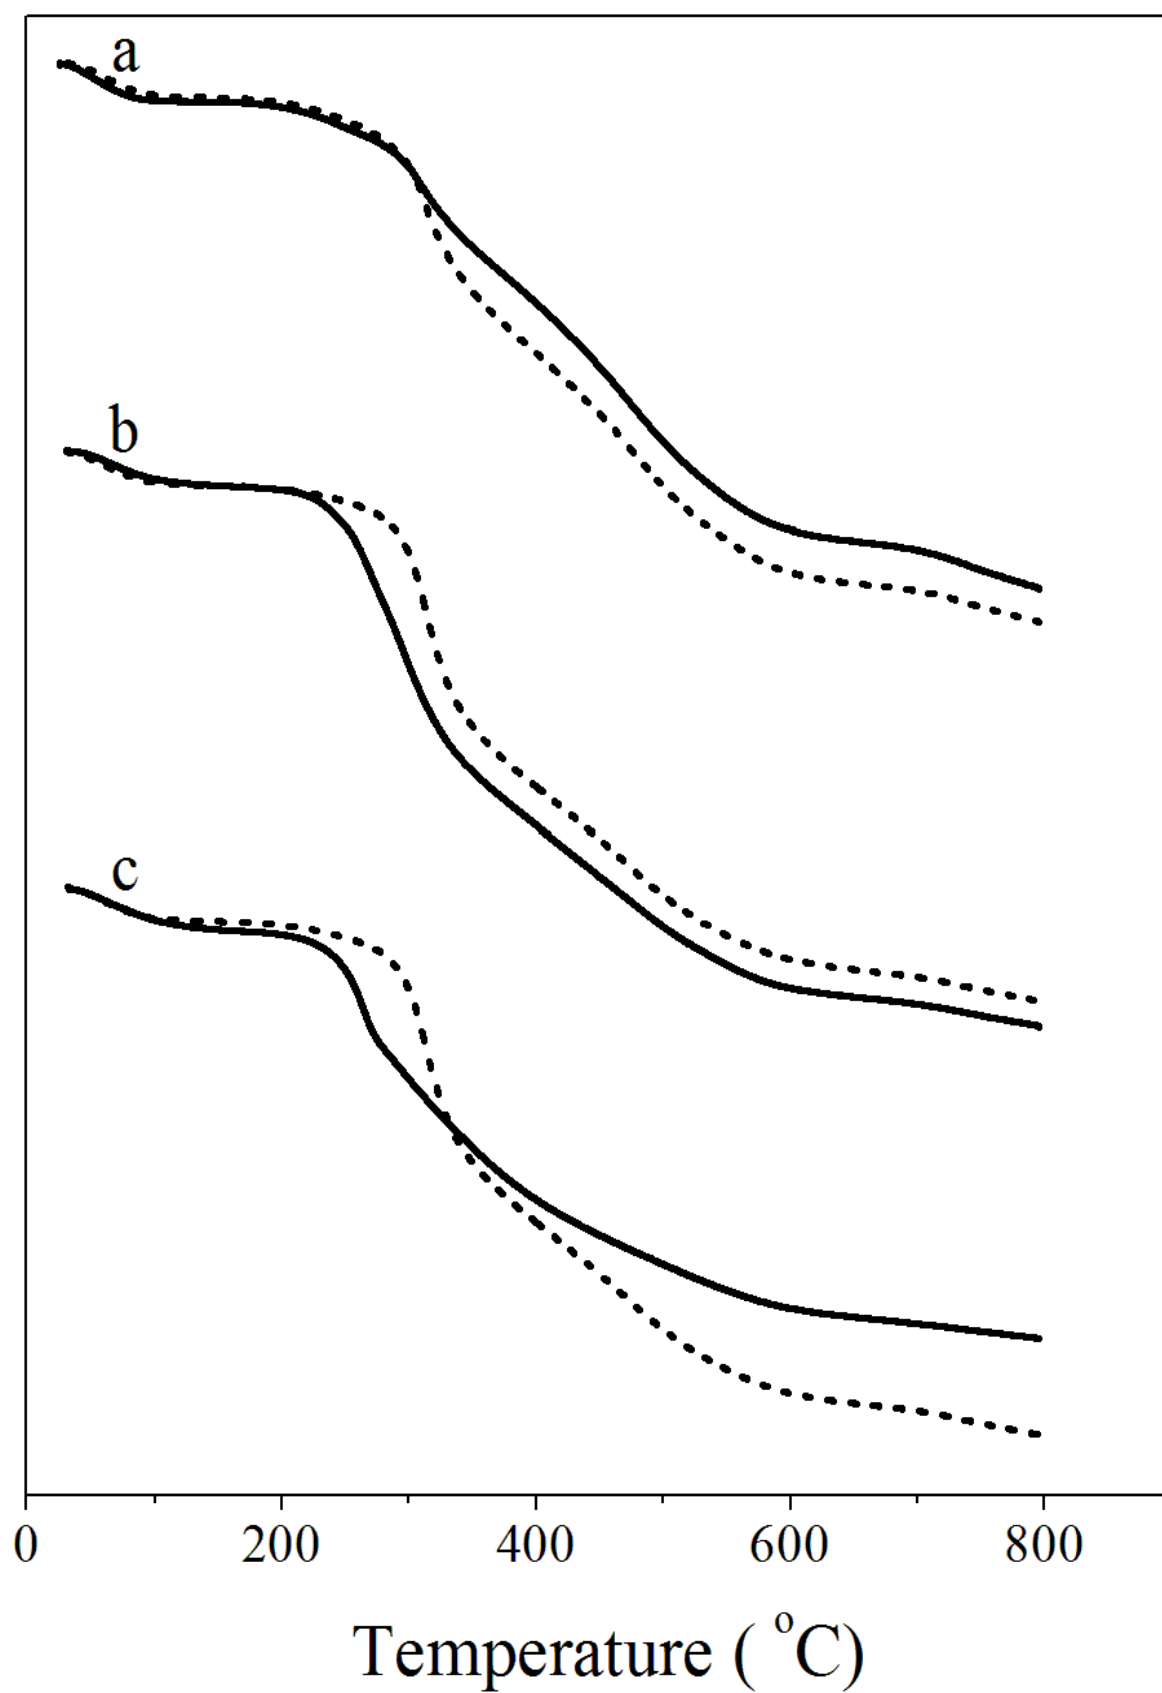

Experimental (—) and theoretical (----) tg curves for (a) pani-clay, (b) pani-chitosan, and (c) pani-chitosan-clay.
